# Supplementary material
Source: Springer Nature journal article supplement (https://www.springermedizin.de/resource/supplementary/12936_2009_913_MOESM1_ESM.pdf/9548524)
Supplement: MOESM1 [file 9548524]

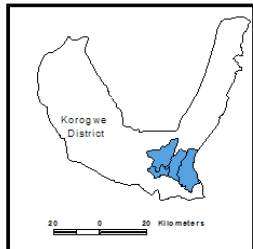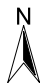

Highlands

Kwshemshi #

Kwamhanya #

Vugiri #

Mgundi #

VUGIRI WARD

KWAMN DOLWA WARD

Mng'aza #

KWAGUNDA WARD

Msambiazi #

Kwasemangube #

Masuguru #

Monga #

MSAMBIAZI WARD

Magunga cheke #

Kwagunda #

Cereza east #

Lowland urban

4 0 4 Kilometers

A scale bar for the main map, divided into segments for 4, 0, and 4 kilometers.
